# Supplementary material for: Prolyl Carboxypeptidase Activity Is Present in Human Adipose Tissue and Is Elevated in Serum of Obese Men with Type 2 Diabetes
Source: MDPI journal article supplement (doi:10.3390/ijms232113529), 2022-11-04
Supplement: s1 [file s1]

**Supplementary Table S1: Pearson correlations between serum PRCP activity and SCAT and VAT immune cell populations.**

|                                               | r SCAT | p SCAT | r VAT        | p VAT        |
|-----------------------------------------------|--------|--------|--------------|--------------|
| Total CD45+ leukocytes, % of total cells      | -0.200 | 0.215  | 0.096        | 0.550        |
| CD11c+ M1 macrophages, % of total cells       | -0.158 | 0.332  | -0.155       | 0.334        |
| CD11c- M2 macrophages, % of total cells       | -0.064 | 0.694  | -0.056       | 0.726        |
| M1/M2 ratio                                   | -0.184 | 0.255  | 0.192        | 0.229        |
| CD56+ NK cells, % of total cells              | -0.028 | 0.866  | 0.139        | 0.386        |
| CD3+ T-cells, % of total cells                | 0.063  | 0.700  | <b>0.310</b> | <b>0.049</b> |
| CD3+ CD4+ T-helper cells, % of total cells    | 0.038  | 0.816  | 0.006        | 0.971        |
| CD3+ CD8+ cytotoxic T-cells, % of total cells | 0.154  | 0.342  | <b>0.492</b> | <b>0.001</b> |
| CD19+ B-cells, % of total cells               | -0.042 | 0.799  | 0.039        | 0.809        |

**Supplementary Table S2: Pearson correlations between SCAT PRCP activity and SCAT immune cell populations and Pearson correlations between VAT PRCP activity and VAT immune cell populations.**

|                                               | r SCAT       | p SCAT       | r VAT  | p VAT |
|-----------------------------------------------|--------------|--------------|--------|-------|
| Total CD45+ leukocytes, % of total cells      | -0.256       | 0.197        | 0.140  | 0.370 |
| CD11c+ M1 macrophages, % of total cells       | -0.112       | 0.577        | -0.008 | 0.957 |
| CD11c- M2 macrophages, % of total cells       | -0.116       | 0.564        | -0.157 | 0.314 |
| M1/M2 ratio                                   | 0.036        | 0.859        | 0.140  | 0.372 |
| CD56+ NK cells, % of total cells              | 0.130        | 0.519        | 0.022  | 0.891 |
| CD3+ T-cells, % of total cells                | 0.024        | 0.907        | 0.179  | 0.252 |
| CD3+ CD4+ T-helper cells, % of total cells    | 0.016        | 0.935        | 0.110  | 0.482 |
| CD3+ CD8+ cytotoxic T-cells, % of total cells | -0.126       | 0.533        | 0.171  | 0.273 |
| CD19+ B-cells, % of total cells               | <b>0.456</b> | <b>0.017</b> | 0.181  | 0.245 |
